# Supplementary material
Source: ML conference proceedings conference paper supplement (https://openreview.net/forum?id=3rBu7dR7rm)
Supplement: supplementary_material [file attachment]

## Sheet: Sheet1
		neural ODE		N-Linear		latent N-Linear		deepAR CL		deepAR vanilla		LSTM		SpaceTime		N-Hits		PatchT
		mse	mae	mse	mae	mse	mae	mse	mae	mse	mae	mse	mae	mse	mae	mse	mae	mse	mae
dataset	$L$
large_cheetah_medium_dense_1000	96	0.911905	0.797939	0.81407	0.728465	0.80074	0.72206	0.793804	0.711567	0.896966	0.790276	0.798312	0.719935	0.799059	0.719359	0.817918	0.730495	0.91303	0.772156
	250	0.951507	0.823629	0.800962	0.717616	0.782654	0.70909	0.761107	0.693588	0.945636	0.818927	0.769808	0.700945	0.779181	0.707339	0.81855	0.72736	0.885724	0.754023
	500	0.894462	0.789662	0.733796	0.675196	0.704151	0.660104	0.678321	0.642615	0.939154	0.815774	0.683667	0.645565	0.69867	0.657064	0.770181	0.690203	0.802332	0.704094
large_hopper_medium_dense_1000	96	0.738885	0.496374	0.752179	0.506843	0.725001	0.48492	0.717033	0.477038	0.71982	0.48054	0.717001	0.477511	0.732098	0.494389	0.736511	0.494409	1.14351	0.626121
	250	0.786725	0.517576	0.806798	0.530829	0.76726	0.502647	0.747432	0.482417	0.747744	0.483602	0.739353	0.481444	0.770003	0.502194	0.785028	0.519099	1.16223	0.635941
	500	0.684996	0.480435	0.733778	0.523389	0.680222	0.481092	0.626645	0.444176	0.648422	0.452428	0.628728	0.442403	0.67419	0.474839	0.692923	0.495755	0.953579	0.581916
large_walker_medium_dense_1000	96	0.871289	0.656017	0.878637	0.658889	0.870625	0.652889	0.863749	0.645655	0.868919	0.649456	0.862173	0.644759	0.867811	0.648723	0.8761	0.653062	1.27999	0.794991
	250	0.902411	0.660274	0.940091	0.69603	0.88907	0.653866	0.846022	0.617947	0.848696	0.621186	0.850234	0.617072	0.873657	0.644514	0.905054	0.668924	1.30143	0.798889
	500	0.72539	0.544005	0.826977	0.628974	0.749382	0.561768	0.684257	0.503616	0.685263	0.50361	0.685954	0.503935	0.763362	0.572142	0.795425	0.590285	1.05501	0.687572
large_cheetah_medium_deter_1000	96	0.929771	0.805827	0.805066	0.720798	0.795829	0.715402	0.783072	0.70566	0.918976	0.789562	0.789128	0.71356	0.793353	0.714521	0.80868	0.722251
	250	0.950258	0.823032	0.787992	0.708303	0.770821	0.700324	0.746345	0.683996	0.960148	0.826481	0.758389	0.691817	0.765389	0.697882	0.795193	0.712866
	500	0.910164	0.798645	0.716873	0.661714	0.686876	0.644907	0.650348	0.618812	0.941577	0.815316	0.664712	0.630776	0.678403	0.641256	0.746171	0.675459
large_hopper_medium_deter_1000	96	0.633535	0.465843	0.605254	0.433536	0.583244	0.421045	0.578707	0.419405	0.579969	0.420027	0.56455	0.408088	0.588217	0.434036	0.557267	0.413065
	250	0.656065	0.477923	0.661189	0.478021	0.612527	0.448976	0.602472	0.440922	0.602125	0.43817	0.595428	0.436457	0.638007	0.467001	0.622488	0.458215
	500	0.54222	0.448507	0.560092	0.461037	0.490705	0.417174	0.436606	0.378876	0.449525	0.385632	0.427517	0.374264	0.498312	0.421388	0.507373	0.432235
large_walker_medium_deter_1000	96	0.751838	0.551785	0.739561	0.530536	0.73618	0.528788	0.733638	0.525063	0.739621	0.52858	0.73176	0.523567	0.737409	0.532196	0.736049	0.529768
	250	0.850845	0.609544	0.8566	0.613061	0.838071	0.600729	0.827488	0.589767	0.828306	0.591608	0.83001	0.590299	0.839147	0.599915	0.850223	0.611978
	500	0.864245	0.6022	0.959832	0.674532	0.889113	0.622706	0.786207	0.548331	0.817031	0.564348	0.804237	0.555797	0.87424	0.61603	0.9321	0.643864
large_lotka_2000	96	0.897434	0.683722	0.891332	0.676646	0.807786	0.610677	0.814939	0.62058	0.885018	0.669464	0.804327	0.606623	0.82728	0.634339	0.826475	0.628401	0.994021	0.692491
	500	0.871994	0.658271	0.84074	0.64032	0.792654	0.59421	0.794645	0.586567	0.868392	0.650103	0.778038	0.58923	0.811759	0.632601	0.801305	0.607504	0.952389	0.663706
	1000	0.780878	0.595129	0.869719	0.667258	0.698092	0.529459	0.6449	0.5046	0.756946	0.578268	0.630062	0.492132	0.869683	0.671658	0.709706	0.546318	0.823323	0.584765
large_mackey_glass_2000	96	0.960799	0.793281	0.822471	0.704888	0.68025	0.578771	0.796472	0.68534	0.998162	0.817853	0.671342	0.587945	0.739136	0.644923	0.636996	0.552944	0.768144	0.643198
	500	0.883358	0.7565	0.900887	0.763019	0.79892	0.670155	0.704371	0.618552	0.975286	0.808776	0.658409	0.580223	0.813091	0.705183	0.735525	0.633448	0.878024	0.730033
	1000	0.859059	0.748249	0.918817	0.774587	0.778741	0.663853	0.960903	0.601186	0.963118	0.800956	0.494486	0.46257	0.989856	0.817204	0.731591	0.644682	0.855368	0.721602
large_lorenz_2000	96	0.756814	0.672593	0.688527	0.596479	0.544688	0.486475	0.607572	0.553861	0.656452	0.589199	0.556208	0.507123	0.629889	0.574078	0.483583	0.426091	0.701669	0.549234
	500	0.840971	0.735433	0.842389	0.729735	0.606387	0.530706	0.66793	0.601278	0.904745	0.782903	0.598716	0.540688	0.763495	0.680339	0.583055	0.517612	0.94394	0.735605
	1000	0.798398	0.704375	0.875645	0.753263	0.71433	0.620275	0.830676	0.627036	0.648662	0.596237	0.465552	0.433843	0.965065	0.819607	0.672954	0.586253	1.04692	0.810675
large_ks100_1000	96					0.985217	0.819249	0.92495	0.780272	0.962468	0.805786	0.961968	0.806328	0.971051	0.814769			1.05129	0.846236
	250					0.997311	0.829238	0.904125	0.767547	0.967958	0.809318	0.967897	0.810939	0.973068	0.816469			1.0617	0.851126
	500					0.988276	0.823792	0.859521	0.737672	0.93333	0.786565	0.942185	0.794657	0.969995	0.81593			1.03744	0.840687
large_mso_2000	1	0.988262	0.802611	0.331605	0.441378	0.000805508	0.018481	0.690265	0.700912	0.982577	0.798798	0.874974	0.71225	9.72258e-05	0.00763329	4.94022e-08	0.000166431	6.071	1.88188
	2	0.988938	0.803241	0.0180824	0.1023	1.46778e-05	0.00240107	0.536023	0.633995	0.988792	0.80241	0.798634	0.667047	6.26374e-05	0.00635139	9.2887e-08	0.000219831	10.7166	2.5309
	8	0.996717	0.809822	3.5249e-11	4.13974e-06	1.29678e-07	0.000247719	0.0302403	0.132923	0.990153	0.803654	0.852177	0.701115	2.89606e-05	0.00418574	4.06065e-08	0.000158249	0.000297	0.011953
	96	1.00479	0.813861	4.39744e-09	2.46199e-05	1.09663e-08	7.29822e-05	0.0373022	0.14887	0.996027	0.809691	0.769806	0.630815	0.00013951	0.00934097	2.16161e-08	0.000114118	0.000542	0.015327
large_cahn_hillard_1000	96					0.830029	0.776751	1.00975	0.88819	0.998768	0.878805	0.744475	0.713381	0.566684	0.630531			0.456173	0.522012
	250					0.865151	0.794037	0.591163	0.637114	0.997847	0.864432	0.73482	0.707385	0.494767	0.584021			0.364781	0.453174
	500					0.893138	0.803681	0.498971	0.571728	1.17486	0.97445	0.66603	0.664712	0.790482	0.74493			0.273021	0.392959
