# Supplementary material
Source: ML conference proceedings conference paper supplement (https://openreview.net/forum?id=3rBu7dR7rm)
Supplement: supplementary_material [file benchmark_reallife.xlsx]

## Sheet: Sheet1
		neural ODE		N-Linear		latent N-Linear		DeepAR CL		DeepAR vanilla		LSTM		SpaceTime		N-Hits		PatchT
		mse	mae	mse	mae	mse	mae	mse	mae	mse	mae	mse	mae	mse	mae	mse	mae	mse	mae
dataset	$L$
ETTm1+2	96	0.319376	0.40771	0.232565	0.349513	0.215718	0.3332	0.229088	0.342287	0.34711	0.435439	0.243297	0.353854	0.210722	0.330603	0.213663	0.331968	0.222348	0.342338
	336	0.332743	0.436859	0.190847	0.319954	0.177035	0.303728	0.183795	0.315864	0.224818	0.341891	0.2109	0.330196	0.173871	0.308561	0.173948	0.303725	0.172767	0.306534
	720	0.959053	0.781641	0.157139	0.290995	0.150073	0.28219	0.179621	0.310059	0.185847	0.316674	0.16976	0.299111	0.170417	0.312064	0.154489	0.291044	0.15152	0.288873
M4	96	0.240847	0.251643	0.249535	0.24633	0.222072	0.224918	0.225126	0.238582	0.229427	0.242383	0.224233	0.233523	0.19869	0.217113	0.208563	0.222976	0.206259	0.214462
	168	0.152038	0.188697	0.144983	0.169983	0.135787	0.161409	0.133061	0.1666	0.129079	0.164864	0.13685	0.164392	0.124813	0.160376	0.118941	0.157319	0.126852	0.15377
Electric	96	4.54833	1.57803	0.352585	0.0498464	0.285135	0.0462342	0.988981	0.100927	1.52182	0.169385	0.913662	0.0990516	0.154291	0.0450433	0.299183	0.0537246	0.35855	0.0571396
	336	4.73142	1.28313	0.2649	0.0454785	0.193598	0.0400601	0.852248	0.101582	1.25814	0.212117	0.722987	0.0964218	0.134642	0.0526092	0.210318	0.0483291	0.315964	0.0536533
	720	0.818644	0.117033	0.108486	0.034703	0.192425	0.0433388	0.706225	0.0950457	1.13062	0.18181	0.701967	0.0920594	0.245119	0.0722886	0.17109	0.0441813	0.186257	0.0439233
ETTm (long)	1000	0.304505	0.407455	0.162582	0.299186	0.158059	0.292825	0.188721	0.317966	0.320511	0.43376	0.190144	0.317417	1.02186	0.916142	0.168449	0.301545	0.163037	0.300842
PEMS-BAY	144	0.762065	0.40844			0.675384	0.412281	0.713194	0.381791	0.72688	0.376989	0.667612	0.36454	0.685192	0.385848
Weather	96	1.66327	0.842055	0.975112	0.493021	0.706453	0.426845	0.747134	0.454146	0.876359	0.535543	0.719308	0.433857	0.7308	0.44563	0.817912	0.468767	0.912673	0.460347
	250	0.850637	0.529391	0.858518	0.472085	0.687357	0.421486	0.748792	0.453287	0.874077	0.536154	0.691839	0.417854	0.713086	0.427975	0.84756	0.464875	0.805999	0.433165
	500	0.663283	0.405344	0.755376	0.448718	0.65895	0.405802	0.724071	0.434869	0.729014	0.444901	0.674309	0.407377	0.69496	0.427262	0.827474	0.44516	0.71825	0.403026
